# Supplementary material for: The role of bone cement for the development of intraoperative hypotension and hypoxia and its impact on mortality in hemiarthroplasty for femoral neck fractures
Source: PubMed Central journal article supplement (PMC8023921; doi:10.1080/17453674.2020.1745510), 2020-04-02
Supplement: IORT_A_1745510_SM4407.pdf [file IORT_A_1745510_SM4407.pdf]

## Supplementary data

Table 4. Cox regressions on combinations of clinically important risk factors for outcome

| Variables                                                                                                                                                                                                                                                                               | number | HR (95% CI)   | p-value | E-value (95% CI) |
|-----------------------------------------------------------------------------------------------------------------------------------------------------------------------------------------------------------------------------------------------------------------------------------------|--------|---------------|---------|------------------|
| Living, mobility, sex, age, ASA, $\beta$ -blocker, diuretics, antiplatelet drugs, statin, liver disease, diabetes, stroke, peripheral vascular disease, arteriosclerosis, previous myocardial infarction, congestive heart failure, cancer, dementia, arrhythmia, renal failure, anemia | 21     | 1.9 (1.3–2.7) | 0.001   | 3.1 (1.8–NA)     |
| Living, sex, ASA, age, mobility                                                                                                                                                                                                                                                         | 5      | 1.8 (1.2–2.6) | 0.002   | 2.9 (1.8–NA)     |
| Age, ASA, living, renal failure, liver disease, dementia, previous myocardial infarction, diabetes, stroke                                                                                                                                                                              | 9      | 1.8 (1.2–2.6) | 0.002   | 3.0 (1.8–NA)     |
| Sex, ASA, age, living, liver disease, renal failure, dementia, previous myocardial infarction, diabetes, stroke, mobility, peripheral vascular disease, arteriosclerosis, congestive heart failure, cancer, arrhythmia, diuretics, statins                                              | 18     | 1.8 (1.3–2.7) | 0.001   | 3.1 (1.8–NA)     |
| Sex, ASA, age, living, liver disease, renal failure, dementia, mobility, peripheral vascular disease, arteriosclerosis, congestive heart failure, cancer, arrhythmia, diuretics, statins                                                                                                | 15     | 1.8 (1.3–2.7) | 0.001   | 3.1 (1.9–NA)     |
| ASA, age, living, renal failure, liver disease, dementia                                                                                                                                                                                                                                | 6      | 1.7 (1.2–2.5) | 0.004   | 2.8 (1.7–NA)     |
| Irrespective of the number and combinations of these risk factors, the HR for bone cementation ranges from 1.7 to 1.9 with p-values 0.004 to 0.001                                                                                                                                      |        |               |         |                  |
